# Supplementary material
Source: publisher site journal article supplement (https://www.dovepress.com/article/576384)
Supplement: Supplementary file 1 [file 576384%20Revised%20Supplementary%20tables%20and%20figures.docx]

**Supplementary tables and figures for manuscript:**

**Real-Life Use of Subcutaneous Biologicals and JAK Inhibitors in IBD Maintenance Therapy: Treatment Continuation, Switching Patterns, and Concomitant Medications**

**Supplementary Tables**

**Supplementary Table 1.** Conventional medications,subcutaneous biologicals and JAK inhibitors with reimbursement status for inflammatory bowel disease in Finland.

an<5 or 0 olsalazine, methylprednisolone and dexamethasone. bExisting, new, and withdrawn entitlements to reimbursement of drug expenses. Statistical database of the Social Insurance Institution (Kela). Retrieved from <https://tietotarjotin.fi/tilastodata/2051231/tilastotietokanta-kelasto>, on March 28, 2025.

**Abbreviations:** 5-ASA, 5-aminosalicylic acid; ATC, anatomic therapeutic chemical; CD, Crohn’s disease; CS, corticosteroid; IL, interleukin; IS, immunosuppressant;TNF, tumor necrosis factor; UC, ulcerative colitis.

| **Active substance (ATC)** | **Approval year for reimbursement** | **Indication(s)** | **Mechanism of action** |
| --- | --- | --- | --- |
| Azathioprine (L04AX01), mercaptopurine (L01BB02), methotrexate (L01BA01, L04AX03), cyclosporine (L04AD01, L04AA01) | <1990b | CD, UC | Immunosuppressants (IS) |
| Mesalazine (A07EC02), sulphasalazine (A07EC01), olsalazine (A07EC03)a | <1990b | CD, UC | 5-aminosalicylates (5-ASA) |
| Prednisolone (H02AB06, A07EA01), prednisone (H02AB07, A07EA03), methylprednisolone (H02AB04)a, hydrocortisone (H02AB09, A07EA02), dexamethasone (H02AB02)a, budesonide (A07EA06) | <1990b | CD, UC | Corticosteroids (CS) |
| Adalimumab (L04AB04, L04AA17) | 2007 | CD, UC | TNF-alpha inhibitor |
| Golimumab (L04AB06) | 2010 | UC | TNF-alpha inhibitor |
| Infliximab (L04AB02, L04AA12) | 2021 | CD, UC | TNF-alpha inhibitor |
| Vedolizumab (L04AG05, L04AA33) | 2021 | CD, UC | α₄β₇-integrin antagonist |
| Ustekinumab (L04AC05) | 2016 | CD | IL-12/23 antagonist |
| 2020 | UC |
| Risankizumab (L04AC18) | 2023 | CD | IL-23A antagonist |
| Tofacitinib (L04AF01, L04AA29) | 2019 | UC | JAK inhibitor |
| Upadacitinib (L04AF03, L04AA44) | 2023 | CD, UC | JAK inhibitor |
| Filgotinib (L04AF04, L04AA45) | 2023 | UC | JAK inhibitor |

**Supplementary Table 2**. Use of the conventional medications (medication groups, IS, 5-ASA and CS, and the most common individual medications) 6 months before and after initiation of subcutaneous (SC) biologicals or JAK inhibitors (JAKis).

aThe number of patients for risankizumab was <5. bResults are shown for on-label indications during 2003–2023. cn<5 or 0 for olsalazine, methylprednisolone and dexamethasone.

**Abbreviations:** 5-ASA, 5-aminosalicylic acid (mesalazine, sulfasalazine, olsalazine); CD, Crohn’s disease; CS, corticosteroids (budesonide, dexamethasone, prednisolone, prednisone, methylprednisolone, hydrocortisone); IS, immunosuppressants (azathioprine, methotrexate, mercaptopurine, cyclosporine); JAK, Janus kinase; UC, ulcerative colitis.

| **SC biologicalsa** | | | | | | | | | | | | |
| --- | --- | --- | --- | --- | --- | --- | --- | --- | --- | --- | --- | --- |
|  | **Adalimumab** | | | | **Golimumabb** | **Infliximab** | | | **Vedolizumab** | | **Ustekinumab** | |
|  | CD  (N=3,156) | | UC  (N=1,891) | | UC  (N=579) | CD  (N=650) | UC  (N=1,117) | | CD  (N=333) | UC  (N=595) | CD  (N=828) | UC  (N=616) |
| **Conventional medication typec** | | | | | | | | | | | | |
| **IS** | | | | | | | | | | | | |
| Before, n (%) | 1,846  (58%) | 1,037 (55%) | | | 310  (54%) | 383  (59%) | | 694 (62%) | 97  (29%) | 170  (29%) | 324  (39%) | 208  (34%) |
| After, n (%) | 1,468  (47%) | 845  (45%) | | | 261  (45%) | 351  (54%) | | 620 (56%) | 69  (21%) | 138  (23%) | 220  (27%) | 130  (21%) |
| ***Azathioprine*** | | | | | | | | | | | | |
| Before, n (%) | 901  (29%) | 471  (25%) | | | 160  (28%) | 224  (34%) | | 388 (35%) | 45  (14%) | 94  (16%) | 126  (15%) | 90  (15%) |
| After, n (%) | 755  (24%) | 382  (20%) | | | 127  (22%) | 210  (32%) | | 362 (32%) | 34  (10%) | 81  (14%) | 90  (11%) | 57  (9%) |
| ***Mercaptopurine*** |  |  | | |  |  | |  |  |  |  |  |
| Before, n (%) | 303  (10%) | 278  (15%) | | | 69  (12%) | 77  (12%) | | 238  (21%) | 19  (6%) | 49  (8%) | 38  (5%) | 60  (10%) |
| After, n (%) | 144  (5%) | 170  (9%) | | | 45  (8%) | 67  (10%) | | 196 (18%) | 13  (4%) | 29  (5%) | 26  (3%) | 34  (6%) |
| ***Methotrexate*** |  |  | | |  |  | |  |  |  |  |  |
| Before, n (%) | 553  (18%) | 272  (14%) | | | 86  (15%) | 74  (11%) | | 63  (6%) | 25  (8%) | 18  (3%) | 121  (15%) | 33  (5%) |
| After, n (%) | 478  (15%) | 263  (14%) | | | 82  (14%) | 71  (11%) | | 58  (5%) | 16  (5%) | 13  (2%) | 84  (10%) | 23  (4%) |
| ***Cyclosporine*** |  |  | | |  |  | |  |  |  |  |  |
| Before, n (%) | 13  (0.4%) | 18  (1%) | | | 5  (1%) | <5 | | <5 | <5 | 5  (1%) | <5 | <5 |
| After, n (%) | 7  (0.2%) | 7  (0.4%) | | | <5 | <5 | | 0  (0%) | <5 | 5  (1%) | <5 | <5 |
| **5-ASA** | | | | | | | | | | | | |
| Before, n (%) | 975  (31%) | 1,274 (67%) | | | 386  (67%) | 94  (14%) | | 589 (53%) | 60  (18%) | 295  (50%) | 122  (15%) | 354  (57%) |
| After, n (%) | 828  (26%) | 1,141 (60%) | | | 343  (59%) | 80  (12%) | | 497 (44%) | 62  (19%) | 262  (44%) | 113  (14%) | 297  (48%) |
| ***Mesalazine*** | | | | | | | | | | | | |
| Before, n (%) | 773  (24%) | 1,122 (59%) | | | 334  (58%) | 75  (12%) | | 566 (51%) | 53  (16%) | 288  (48%) | 97  (12%) | 343  (56%) |
| After, n (%) | 645  (20%) | 1,002 (53%) | | | 301  (52%) | 63  (10%) | | 473 (42%) | 49  (15%) | 251  (42%) | 85  (10%) | 284  (46%) |
| ***Sulfasalazine*** |  |  | | |  |  | |  |  |  |  |  |
| Before, n (%) | 221  (7%) | 227  (12%) | | | 66  (11%) | 20  (3%) | | 29  (3%) | 8  (2%) | 16  (3%) | 25  (3%) | 14  (2%) |
| After, n (%) | 195  (6%) | 182  (10%) | | | 51  (9%) | 17  (3%) | | 27  (2%) | 14  (4%) | 17  (3%) | 28  (3%) | 19  (3%) |
| **CS** | | | | | | | | | | | | |
| Before, n (%) | 1,430  (45%) | 1,000 (53%) | | | 34  (59%) | 65  (10%) | | 217 (19%) | 80  (24%) | 154  (26%) | 361  (44%) | 372  (60%) |
| After, n (%) | 823  (26%) | 578  (31%) | | | 247  (43%) | 44  (7%) | | 109 (10%) | 59  (18%) | 88  (15%) | 222  (27%) | 224  (36%) |
| ***Prednisolone*** | | | | | | | | | | | | |
| Before, n (%) | 817  (26%) | 759  (40%) | | | 250  (43%) | 32  (5%) | | 131 (12%) | 36  (11%) | 83  (14%) | 193  (23%) | 268  (44%) |
| After, n (%) | 450  (14%) | 425  (22%) | | | 188  (32%) | 19  (3%) | | 47  (4%) | 32  (10%) | 41  (7%) | 126  (15%) | 128  (21%) |
| ***Budesonide*** | | | | | | | | | | | | |
| Before, n (%) | 676  (21%) | 330  (17%) | | | 97  (17%) | 36  (6%) | | 112 (10%) | 48  (14%) | 84  (14%) | 199  (24%) | 165  (27%) |
| After, n (%) | 358  (11%) | 170  (9%) | | | 65  (11%) | 28  (4%) | | 66  (6%) | 33  (10%) | 54  (9%) | 116  (14%) | 116  (19%) |
| ***Prednisone*** |  |  | | |  |  | |  |  |  |  |  |
| Before, n (%) | 100  (3%) | 58  (3%) | | | 37  (6%) | 0  (0%) | | 0  (0%) | <5 | 0  (0%) | 6  (1%) | 0  (0%) |
| After, n (%) | 61  (2%) | 31  (2%) | | | 21  (4%) | 0  (0%) | | 0  (0%) | 0  (0%) | 0  (0%) | <5 | <5 |
| ***Hydrocortisone*** |  |  | | |  |  | |  |  |  |  |  |
| Before, n (%) | 56  (2%) | 66  (4%) | | | 27  (5%) | 0  (0%) | | <5 | 5 (2%) | <5 | 8  (1%) | 6  (1%) |
| After, n (%) | 45  (1%) | 56  (3%) | | | 26  (5%) | 0  (0%) | | <5 | <5 | <5 | 8  (1%) | 7  (1%) |
| **JAK inhibitors** | | | | | | |
|  | **Tofacitinibb** | | **Upadacitinib** | | | **Filgotinibb** |
|  | UC  (N=486) | | CD (N=16) | | UC  (N=75) | UC (N=53) |
| **Conventional medication typec** | | | | | | |
| **IS** | | | | | | |
| Before, n (%) | 240  (49%) | | | 9  (56%) | 21  (28%) | 24  (45%) |
| After, n (%) | 50  (10%) | | | 5  (31%) | 6  (8%) | 5  (9%) |
| ***Azathioprine*** | | | | | | |
| Before, n (%) | 108  (22%) | | | <5 | 7  (9%) | 9  (17%) |
| After, n (%) | 15  (3%) | | | <5 | 0  (0%) | 0  (0%) |
| ***Mercaptopurine*** |  | | |  |  |  |
| Before, n (%) | 104  (21%) | | | 0  (0%) | 9  (12%) | 9  (17%) |
| After, n (%) | 7  (1%) | | | 0  (0%) | <5 | 0  (0%) |
| ***Methotrexate*** |  | | |  |  |  |
| Before, n (%) | 23  (5%) | | | 8  (50%) | <5 | <5 |
| After, n (%) | 13  (3%) | | | 5  (31%) | <5 | <5 |
| ***Cyclosporine*** |  | | |  |  |  |
| Before, n (%) | 9  (2%) | | | 0  (0%) | 0  (0%) | 0  (0%) |
| After, n (%) | 0  (0%) | | | 0  (0%) | 0  (0%) | 0  (0%) |
| **5-ASA** | | | | | | |
| Before, n (%) | 315  (65%) | | | <5 | 43  (57%) | 32  (60%) |
| After, n (%) | 245  (50%) | | | <5 | 31  (41%) | 27  (51%) |
| ***Mesalazine*** | | | | | | |
| Before, n (%) | 297  (61%) | | | <5 | 36  (48%) | 30  (57%) |
| After, n (%) | 231  (48%) | | | <5 | 25  (33%) | 25  (47%) |
| ***Sulphasalazine*** |  | | |  |  |  |
| Before, n (%) | 26  (5%) | | | <5 | 7  (9%) | <5 |
| After, n (%) | 20  (4%) | | | <5 | 6  (8%) | <5 |
| **CS** | | | | | | |
| Before, n (%) | 328  (67%) | | | 6  (38%) | 37  (49%) | 22  (42%) |
| After, n (%) | 174  (36%) | | | 8  (50%) | 12  (16%) | 14  (26%) |
| ***Prednisolone*** | | | | | | |
| Before, n (%) | 247  (51%) | | | <5 | 22  (29%) | 14  (26%) |
| After, n (%) | 127  (26%) | | | 7  (44%) | 7  (9%) | 11  (21%) |
| ***Budesonide*** | | | | | | |
| Before, n (%) | 145  (30%) | | | <5 | 22  (29%) | 12  (23%) |
| After, n (%) | 61  (13%) | | | <5 | 8  (11%) | 5  (9%) |
| ***Prednisone*** |  | | |  |  |  |
| Before, n (%) | 8  (2%) | | | 0  (0%) | 0  (0%) | 0  (0%) |
| After, n (%) | <5 | | | 0  (0%) | 0  (0%) | 0  (0%) |
| ***Hydrocortisone*** |  | | |  |  |  |
| Before, n (%) | <5 | | | <5 | 0  (0%) | <5 |
| After, n (%) | 10  (2%) | | | <5 | <5 | <5 |

**Supplementary Table 3.** Factors associated with risk of medication switching between subcutaneous (SC) biologicals or JAK inhibitors independent of treatment line during the study observation period (2003–2023). Results are shown for on-label indications during 2003–2023.

**Abbreviations:** 5-ASA, 5-aminosalicylic acid (mesalazine, sulfasalazine, olsalazine); CD, Crohn’s disease; CI, confidence interval; CS, corticosteroids (budesonide, dexamethasone, prednisolone, prednisone, methylprednisolone, hydrocortisone); HYKS, Helsinki University Central Hospital; IS, immunosuppressants (azathioprine, cyclosporine, methotrexate, mercaptopurine); KYS, Kuopio University Hospital; OR, odds ratio; OYS, Oulu University Hospital; TAYS, Tampere University Hospital; TYKS, Turku University Central Hospital; UC, ulcerative colitis.

|  | **Non-switch treatment periods**  **n (%)** | **Switchtreatment periods**  **n (%)** | **OR**  **(univariate)**  **[95% CI]** | **p-value** | **Adjusted OR (multivariate)**  **[95% CI]** | **p-value** | **p-overall** |
| --- | --- | --- | --- | --- | --- | --- | --- |
| **Gender** |  |  |  |  |  |  | **0.184** |
| Female | 3,935 (83.4%) | 786 (16.6%) | Ref. | Ref. | Ref. | Ref. |  |
| Male | 4,838 (84.3%) | 899 (15.7%) | 0.93 [0.84–1.03] | 0.176 | 0.96 [0.86–1.07] | 0.412 |  |
| **Age group (at the start of 1st SC biological/JAK inhibitor)** | | | | | | | **<0.001** |
| 18-29 | 1,749 (82.1%) | 381 (17.9%) | Ref. | Ref. | Ref. | Ref. |  |
| 30-39 | 2,185 (83.9%) | 419 (16.1%) | 0.88 [0.76–1.03] | 0.101 | 0.92 [0.78–1.08] | 0.289 |  |
| 40-49 | 1,944 (84.9%) | 345 (15.1%) | 0.81 [0.69–0.96] | 0.012 | 0.85 [0.72–0.99] | 0.048 |  |
| 50-65 | 2,130 (82.9%) | 439 (17.1%) | 0.95 [0.81–1.10] | 0.473 | 1.03 [0.88–1.20] | 0.736 |  |
| >65 | 765 (88.3%) | 101 (11.7%) | 0.61 [0.48–0.76] | <0.001 | 0.73 [0.57–0.94] | 0.015 |  |
| **Diagnosis** |  |  |  |  |  |  | **0.304** |
| CD | 4,283 (84.3%) | 799 (15.7%) | Ref. | Ref. | Ref. | Ref. |  |
| UC | 4,490 (83.5%) | 886 (16.5%) | 1.06 [0.95–1.17] | 0.292 | 1.25 [1.10–1.42] | 0.001 |  |
| **Geographical area (University Hospital Catchment Area)** | | | | | | | **<0.001** |
| KYS | 1,209 (83.8%) | 233 (16.2%) | Ref. | Ref. | Ref. | Ref. |  |
| HYKS | 3,060 (85.3%) | 527 (14.7%) | 0.89 [0.76–1.06] | 0.191 | 0.88 [0.74–1.04] | 0.139 |  |
| OYS | 1,566 (80.9%) | 370 (19.1%) | 1.23 [1.02–1.47] | 0.026 | 1.10 [0.91–1.33] | 0.304 |  |
| TAYS | 1,435 (82.6%) | 303 (17.4%) | 1.10 [0.91–1.32] | 0.339 | 1.00 [0.82–1.21] | 0.966 |  |
| TYKS | 1,472 (85.5%) | 249 (14.5%) | 0.88 [0.72–1.07] | 0.189 | 0.88 [0.72–1.08] | 0.210 |  |
| **Quarter** |  |  |  |  |  |  | **<0.001** |
| 1 | 3,193 (86.9%) | 482 (13.1%) | Ref. | Ref. | Ref. | Ref. |  |
| 2 | 2,587 (83.1%) | 526 (16.9%) | 1.35 [1.18–1.54] | <0.001 | 1.30 [1.13–1.50] | <0.001 |  |
| 3 | 1,798 (84.9%) | 319 (15.1%) | 1.18 [1.01–1.37] | 0.039 | 0.98 [0.83–1.14] | 0.764 |  |
| 4 | 1,195 (76.9%) | 358 (23.1%) | 1.98 [1.70–2.31] | 0.000 | 1.64 [1.40–1.93] | <0.001 |  |
| **Use of IS 6 months before switch** | | | | | | | **<0.001** |
| No | 3,997 (78.7%) | 1081 (21.3%) | Ref. | Ref. | Ref. | Ref. |  |
| Yes | 4,776 (88.8%) | 604 (11.2%) | 0.47 [0.42–0.52] | 0.000 | 0.51 [0.45–0.57] | <0.001 |  |
| **Use of 5-ASA 6 months before switch** | | | | | | | **<0.001** |
| No | 4,830 (81.7%) | 1080 (18.3%) | Ref. | Ref. | Ref. | Ref. |  |
| Yes | 3,943 (86.7%) | 605 (13.3%) | 0.69 [0.62–0.76] | <0.001 | 0.62 [0.55–0.70] | <0.001 |  |
| **Use of CS 6 months before switch** | | | | | | | **0.857** |
| No | 5,042 (83.8%) | 973 (16.2%) | Ref. | Ref. | Ref. | Ref. |  |
| Yes | 3,731 (84.0%) | 712 (16.0%) | 0.99 [0.89–1.10] | 0.836 | 0.84 [0.75–0.94] | 0.003 |  |
| **SC biological/JAK inhibitor before** | | | | | | | **<0.001** |
| Adalimumab | 4,920 (82.0%) | 1082 (18.0%) | Ref. | Ref. | Ref. | Ref. |  |
| Golimumab | 508 (71.9%) | 199 (28.1%) | 1.78 [1.49–2.12] | <0.001 | 1.73 [1.42–2.09] | <0.001 |  |
| Infliximab | 1,596 (97.3%) | 44 (2.68%) | 0.13 [0.09–0.17] | 0.000 | 0.12 [0.09–0.16] | <0.001 |  |
| Vedolizumab | 634 (91.4%) | 60 (8.65%) | 0.43 [0.33–0.56] | <0.001 | 0.35 [0.26–0.46] | <0.001 |  |
| Ustekinumab | 738 (80.9%) | 174 (19.1%) | 1.07 [0.90–1.28] | 0.442 | 0.94 [0.78–1.12] | 0.479 |  |
| Tofacitinib | 353 (74.0%) | 124 (26.0%) | 1.60 [1.28–1.98] | <0.001 | 1.48 [1.16–1.86] | 0.001 |  |
| Filgotinib | 24 | <5 | 0.41 [0.06–1.37] | 0.167 | 0.35 [0.05–1.19] | 0.153 |  |

**Supplementary figures**

**Supplementary Figure 1**. Treatment persistence of all treatment periods for SC biologicals (A) adalimumab, (B) golimumab, (C) infliximab, (D) vedolizumab, and (E) ustekinumab, and JAK inhibitors (F) tofacitinib, (G) upadacitinib, and (H) filgotinib estimated using the Kaplan-Meier method and presented as a proportion (range) of patients continuing the treatment. Results are shown for on-label indications during 2003–2023. Discontinuation was considered as a failure event.

**Abbreviations:** CD, Crohn’s disease; CI, confidence interval; JAK, Janus kinase; SC, subcutaneous; UC, ulcerative colitis.
